# Supplementary material
Source: publisher figshare collection journal article supplement (https://acs.figshare.com/ndownloader/files/4721425)
Supplement: Supplementary file 1 [file 4721425]

# Ligand Dependent Catalytic Cycle and Role of Styrene in Nickel-Catalyzed Anhydride Cross-Coupling: Evidence for Turnover Limiting Reductive Elimination

Jeffrey B. Johnson<sup>†</sup>, Eric A. Bercot<sup>†</sup>, John M. Rowley<sup>‡</sup>,  
Geoffrey W. Coates<sup>‡</sup>, Tomislav Rovis<sup>\*,†</sup>

*Department of Chemistry, Colorado State University, Fort Collins, CO 80523 and the  
Department of Chemistry and Chemical Biology, Baker Laboratory, Cornell University, Ithaca,  
NY 14853  
rovis@lamar.colostate.edu*

## Supporting Information

**General Methods.** All reactions were carried out under an atmosphere of argon in oven-dried glassware with magnetic stirring. Tetrahydrofuran (THF) was purged with argon and passed through two columns of neutral alumina. Anhydrides **4** and **8** and Et<sub>2</sub>Zn were obtained from Aldrich Chemical Co. and utilized without further purification. Anhydride **6** was prepared by cyclization of the corresponding commercially available diacid,<sup>1</sup> and anhydride **10** was prepared according to literature procedure.<sup>2</sup> Carbonyl labeled <sup>13</sup>C anhydride **5** was prepared according to literature procedure.<sup>3</sup> Ni(COD)<sub>2</sub> and Ph<sub>2</sub>Zn were purchased from Strem Chemical, Inc. and used without further purification. *i*PrPHOX was prepared according to literature procedure.<sup>4</sup> Alkylated compounds **5**, **7**, **9**, and **11** have been previously prepared and characterized.<sup>1</sup> <sup>1</sup>H, <sup>13</sup>C, and <sup>31</sup>P NMR spectra were obtained on a Varian 300 MHz spectrometer at ambient temperature unless otherwise noted. *In situ* infrared spectra were acquired on a Bruker Tensor 27 IR spectrometer equipped with an Axion Analytical DPR-207 ATM immersion probe. Analytic high performance liquid chromatography (HPLC) was performed on an Agilent 1100 series HPLC using Chiracel chiral columns.

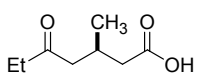

**3-methyl-5-oxo-heptanoic acid (9).** Procedure will be illustrated with a specific example. A dry round bottom flask was charged with Ni(COD)<sub>2</sub> (10.6 mg, 0.039 mmol, 10 mol%) and *i*PrPHOX (16 mg, 0.043 mmol, 11 mol%) in an inert atmosphere glove box. Upon removal from the box, 2 mL of THF was added via

syringe, followed by addition of styrene (10  $\mu$ L, 0.083 mmol, 21 mol%) and Et<sub>2</sub>Zn (51  $\mu$ L, 0.50 mmol, 1.2 equiv). The solution was then cooled to 0 °C in an ice bath and 4-methyl glutaric anhydride **8** (50 mg, 0.39 mmol, 1 equiv) in 1 mL THF was added. Acid-base workup provided an oily solid which was purified by column chromatography (9:1 hexanes:EtOAc), yielding a white crystalline solid. The product was converted to benzyl ester for analysis. HPLC analysis (Chiracel OD-H, 97:3 hex/*i*PrOH, 0.5 mL, 254 nm; tr (minor) 17.8 min, tr (major) 18.6 min gave the isomeric composition of this compound.

**Kinetic Method.** The general kinetic method will be illustrated with a specific example. A 2 mL THF solution (“Solution A”) 0.028 M in Ni(COD)<sub>2</sub> (15.3 mg, 0.056 mmol) and 0.032 M in *i*PrPHOX (24.2 mg, 0.064 mmol) was prepared in an argon purged 10 mL round bottom flask. To this solution styrene (10  $\mu$ L, 0.087 mmol) and Et<sub>2</sub>Zn (100  $\mu$ L, 0.975 mmol) were added. A second 2 mL THF solution (“Solution B”) containing 0.297 M 4-methylglutaric anhydride (76mg, 0.593 mmol) was prepared in an argon purged 5 mL round bottom flask.

The dipping probe of the in situ IR was placed into a 50 mL pear shaped flask equipped with two septum covered sidearms. This flask was purged with argon for 15 minutes prior to addition of 0.5 mL of catalyst-containing solution A. A background IR spectrum was acquired, and subsequent spectra were acquired every 5 seconds. The anhydride containing solution was then added, and the concentration of the substrate was monitored by the CO stretching frequency at 1770 and 1812 cm<sup>-1</sup> (1791 cm<sup>-1</sup> for *cis*-1,2-cyclohexanedicarboxylic anhydride). The reactions were generally followed to at least 50% completion, and the reaction rates were determined from the first ~20% of anhydride consumption.

**Examination of Oxidative Addition Reversibility** will be illustrated with a specific example. A 2 mL THF solution containing Ni(COD)<sub>2</sub> (50 mg, 0.182 mmol), bipy (32 mg, 0.205 mmol) and styrene (40  $\mu$ L, 0.349 mmol) was prepared in a 15 mL argon purged round bottom flask. To this deep purple catalyst solution was added a 1 mL THF solution of *cis*-1,2-cyclohexanedicarboxylic anhydride (34 mg, 0.221 mmol), resulting in a deep red solution. Approximately 10 min later a 1 mL THF solution of 2,3-

dimethylsuccinic anhydride was added. After approximately 2 addition min, a 1 mL THF solution of Et<sub>2</sub>Zn (19  $\mu$ L, 0.185 mmol) was added. The reaction mixture was stirred for 2 h prior to acid/base workup. Upon workup, the ratio of ketoacids from *cis*-1,2-cyclohexanedicarboxylic anhydride and 2,3-dimethylsuccinic anhydride were determined by <sup>1</sup>H NMR spectroscopy.

**Spectroscopic Characterization of Oxidative Addition** A 0.5 mL THF-*d*<sub>8</sub> solution of Ni(COD)<sub>2</sub> (3.7 mg, 0.013 mmol), bipy (2.3 mg, 0.015 mmol) and styrene (3  $\mu$ L, 0.026 mmol) was added a 0.25 mL solution of carbonyl-<sup>13</sup>C-labeled 2,3-dimethylsuccinic anhydride (<sup>13</sup>C-**6**) (8 mg, 0.068 mmol) in a resealable NMR tube with a Teflon screw cap. <sup>13</sup>C NMR spectra were obtained at both ambient temperature and at -60 °C. The carbonyl resonances are included below:

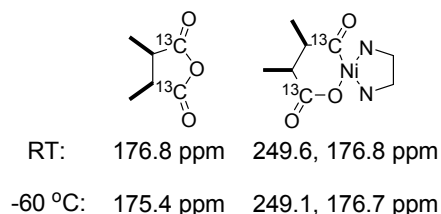

At -78 °C, Et<sub>2</sub>Zn (35  $\mu$ L, 0.35 mmol) was added to the NMR tube containing the catalyst and anhydride. The tube was quickly inserted into an NMR spectrometer precooled to -60 °C. Resonances corresponding to <sup>13</sup>C-**6** ( $\delta$  175.4) and product <sup>13</sup>C-**7** ( $\delta$  212.4 and 182.0) were observed, in addition to two transient peaks ( $\delta$  174.2 and 213.5) which were observed until all starting material was consumed. These peaks are tentatively assigned to intermediate **C**.

The above procedure was repeated with Ni(COD)<sub>2</sub> (3.7 mg, 0.014 mmol) and *i*PrPHOX (5.1 mg, 0.014 mmol) in the presence of styrene (3  $\mu$ L, 0.026 mmol). <sup>31</sup>P NMR spectroscopy on this complex displays a single resonance at  $\delta$  32.6, presumably intermediate **E**. Upon addition of 4-methylglutaric anhydride **8** (7 mg, 0.054 mmol), new resonances were observed in the <sup>31</sup>P NMR spectrum at  $\delta$  39.6 (*J* = 21 Hz) and 22.5 (br). These resonances have been tentatively assigned to the diastereomers resulting from oxidative addition to the Ni/*i*PrPHOX complex.

Ni/bipy w/  $^{13}\text{C}$  labeled **4** (5 equiv)  
 4-F-styrene (2 equiv) THF- $d_8$ , -60 °C

$^{13}\text{C}$  NMR spectrum

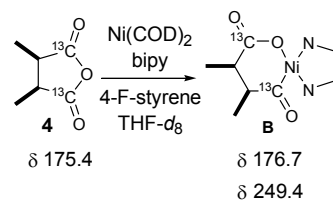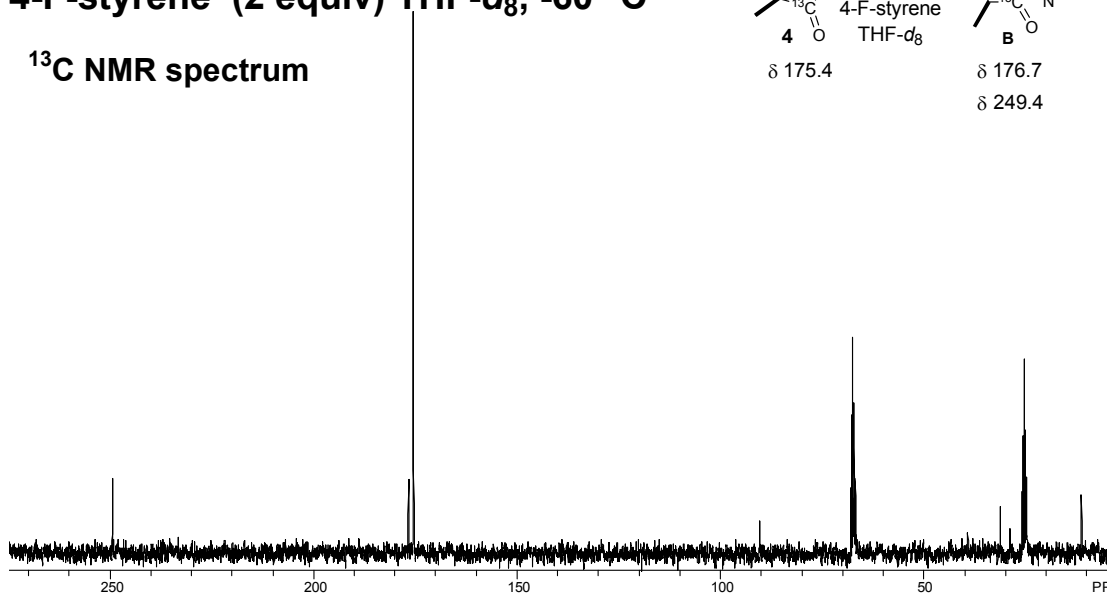

249.411

176.669  
175.418

Expansion of above spectrum

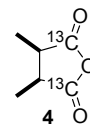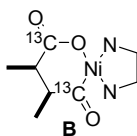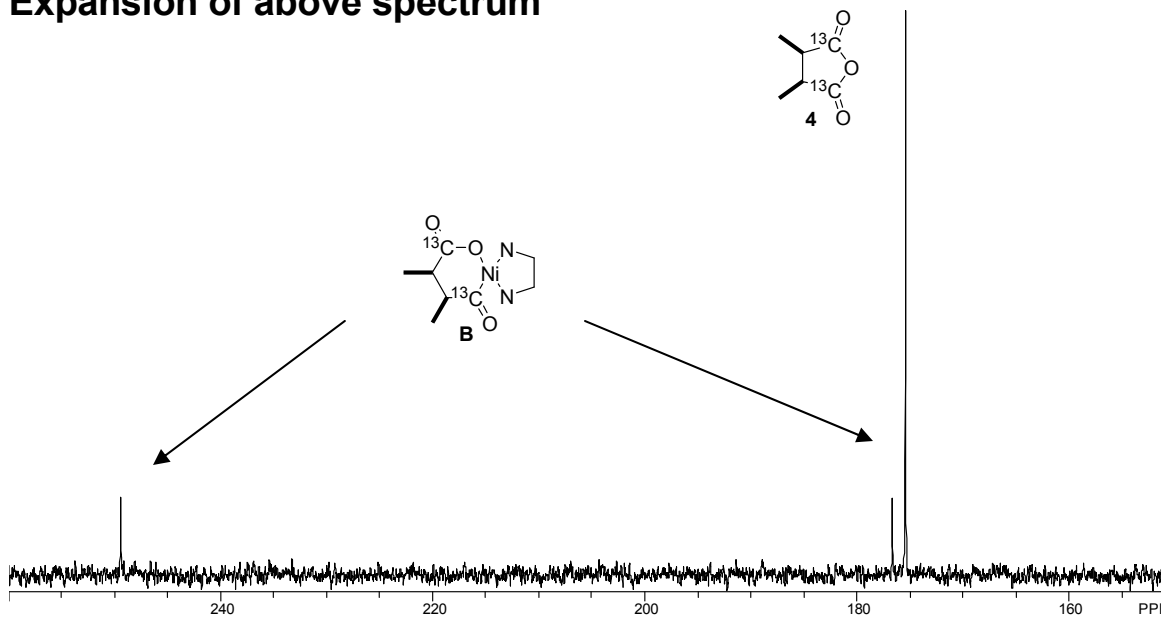

Ni/bipy w/  $^{13}\text{C}$ -4 (5 eq)  
after add'n of 25 eq  $\text{Et}_2\text{Zn}$   
 $\text{THF-d}_8$ ,  $-60^\circ\text{C}$

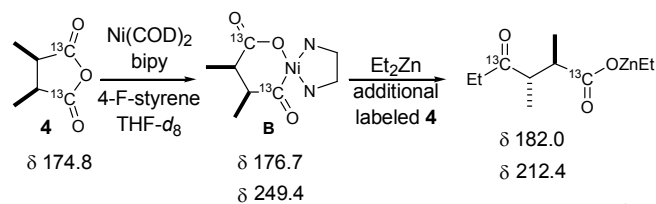

$^{13}\text{C}$  NMR spectrum

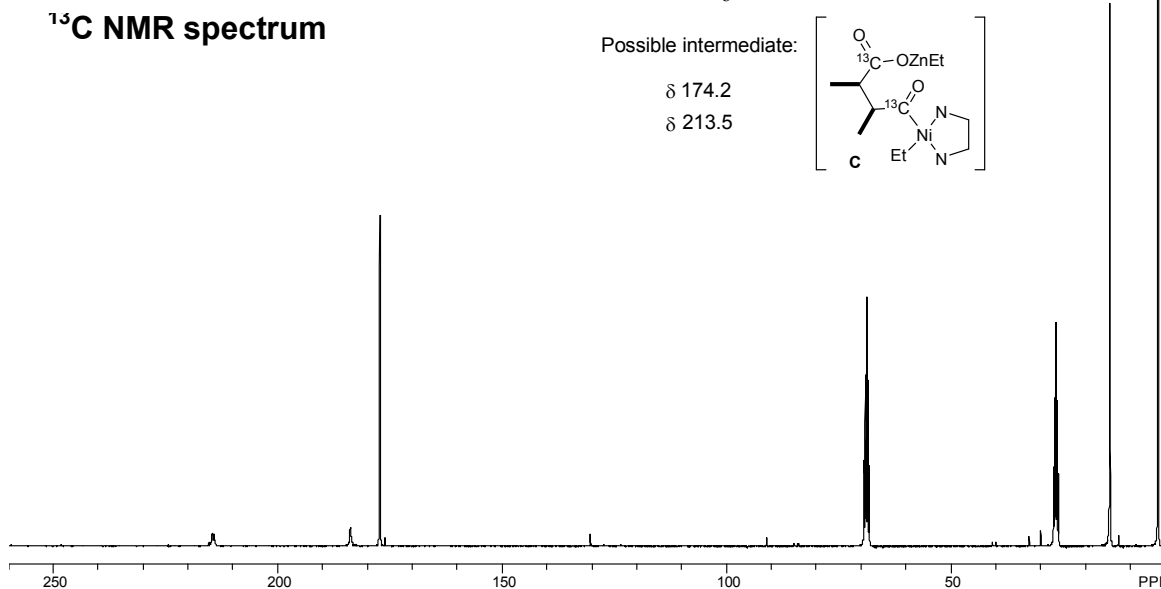

Possible intermediate:

$\delta$  174.2  
 $\delta$  213.5

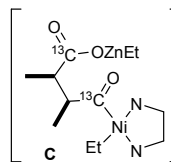

Expansion of above spectrum

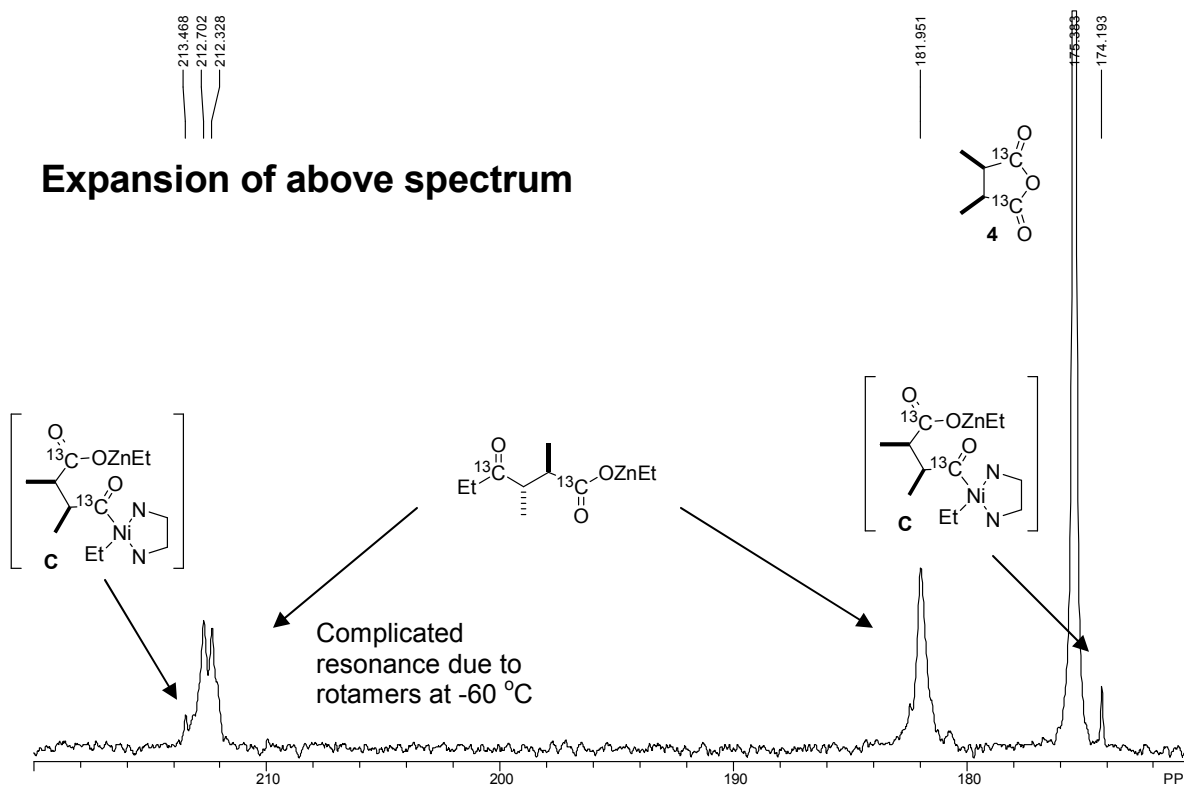

**Ni(COD)<sub>2</sub>/*i*PrPHOX**  
**Styrene (2 equiv) THF-*d*<sub>8</sub>, RT**

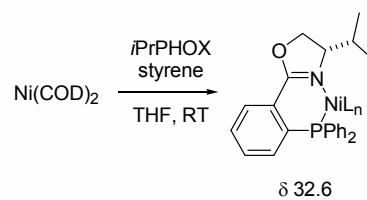

**<sup>31</sup>P NMR Spectrum**

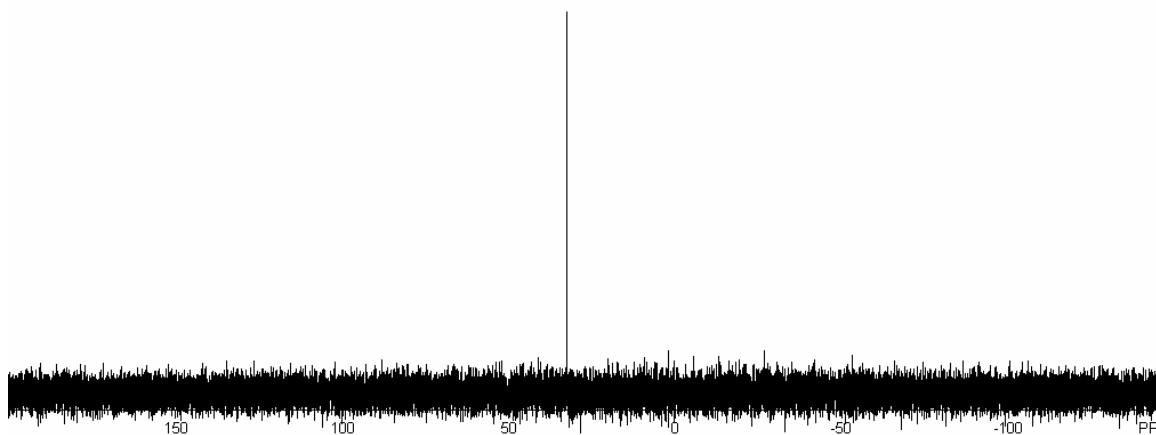

**Ni/*i*PrPHOX w/ **8** (4 equiv)**  
**Styrene (2 equiv) THF-*d*<sub>8</sub>, RT**

**<sup>31</sup>P NMR Spectrum**

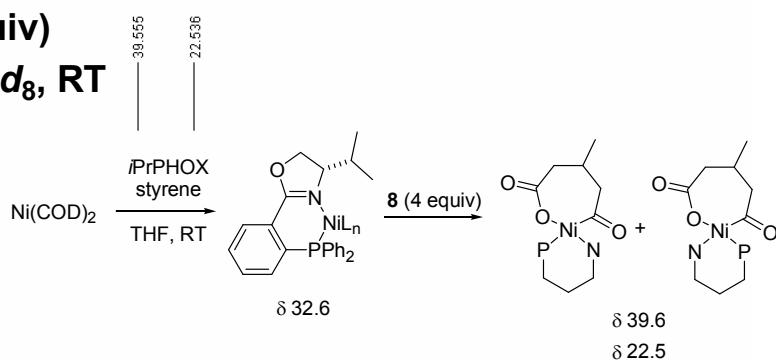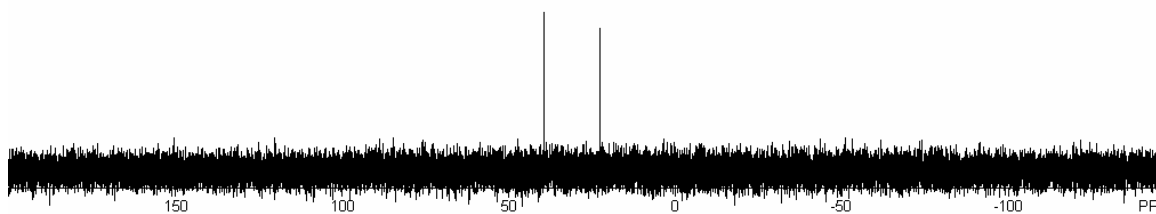

**Kinetic Data for Desymmetrization of *cis*-1,2-cyclohexanedicarboxylic anhydride (**4**) with Ni(COD)<sub>2</sub>, bipy and 4-F-styrene.**

**Table S1.** Initial rate versus Ni(COD)<sub>2</sub>-bipy concentration, with [**4**] = 0.10 M, [Et<sub>2</sub>Zn] = 0.15 M, [4-F-styrene] = 0.016 M, 23 ± 0.5 °C

| Ni(COD) <sub>2</sub> /bipy (M) | Initial Rate (× 10 <sup>-5</sup> M s <sup>-1</sup> ) | Ni(COD) <sub>2</sub> /bipy (M) | Initial Rate (× 10 <sup>-5</sup> M s <sup>-1</sup> ) |
|--------------------------------|------------------------------------------------------|--------------------------------|------------------------------------------------------|
| 0.00259                        | 5.1                                                  | 0.00635                        | 10.9                                                 |
| 0.00259                        | 5.3                                                  | 0.00745                        | 12.2                                                 |
| 0.00259                        | 5.0                                                  | 0.00745                        | 11.8                                                 |
| 0.00423                        | 7.4                                                  | 0.00745                        | 13.3                                                 |
| 0.00423                        | 6.9                                                  | 0.0104                         | 17.5                                                 |
| 0.00635                        | 9.9                                                  | 0.0104                         | 16.6                                                 |
| 0.00635                        | 10.6                                                 | 0.0104                         | 16.5                                                 |
| 0.00635                        | 10.0                                                 |                                |                                                      |

**Table S2.** Initial rate versus *cis*-1,2-cyclohexanedicarboxylic anhydride (**4**) concentration, with [Et<sub>2</sub>Zn] = 0.15 M, [4-F-styrene] = 0.016 M, [Ni(COD)<sub>2</sub>] = 7.7 mM, [bipy] = 8.2 mM, 23 ± 0.5 °C.

| Anhydride ( <b>4</b> ) (M) | Initial Rate (× 10 <sup>-5</sup> M s <sup>-1</sup> ) | Anhydride ( <b>4</b> ) (M) | Initial Rate (× 10 <sup>-5</sup> M s <sup>-1</sup> ) |
|----------------------------|------------------------------------------------------|----------------------------|------------------------------------------------------|
| 0.098                      | 11.3                                                 | 0.15                       | 10.9                                                 |
| 0.098                      | 12.6                                                 | 0.15                       | 12.2                                                 |
| 0.098                      | 10.6                                                 | 0.15                       | 12.8                                                 |
| 0.10                       | 11.8                                                 | 0.054                      | 12.2                                                 |
| 0.10                       | 11.2                                                 | 0.054                      | 11.2                                                 |
| 0.10                       | 10.8                                                 | 0.054                      | 11.5                                                 |
| 0.19                       | 12.3                                                 | 0.20                       | 11.1                                                 |
| 0.19                       | 12.1                                                 | 0.20                       | 12.1                                                 |
| 0.19                       | 11.6                                                 | 0.20                       | 10.5                                                 |

**Table S3.** Initial rate versus Et<sub>2</sub>Zn concentration, with [4] = 0.10 M, [Ni(COD)<sub>2</sub>] = 7.7 mM, [bipy] = 8.2 mM, [4-F-styrene] = 0.016 M, 23 ± 0.5 °C

| Et <sub>2</sub> Zn (M) | Initial Rate (× 10 <sup>-5</sup> M s <sup>-1</sup> ) | Et <sub>2</sub> Zn (M) | Initial Rate (× 10 <sup>-5</sup> M s <sup>-1</sup> ) |
|------------------------|------------------------------------------------------|------------------------|------------------------------------------------------|
| 0.146                  | 10.6                                                 | 0.0976                 | 9.9                                                  |
| 0.146                  | 10.8                                                 | 0.0976                 | 9.7                                                  |
| 0.146                  | 10.4                                                 | 0.0976                 | 10.0                                                 |
| 0.146                  | 11.5                                                 | 0.0732                 | 8.7                                                  |
| 0.146                  | 11.7                                                 | 0.0732                 | 8.3                                                  |
| 0.146                  | 11.9                                                 | 0.0732                 | 9.2                                                  |
| 0.293                  | 12.3                                                 | 0.195                  | 12.6                                                 |
| 0.293                  | 12.5                                                 | 0.195                  | 12.2                                                 |
| 0.293                  | 11.9                                                 | 0.195                  | 11.5                                                 |
| 0.195                  | 11.1                                                 | 0.244                  | 10.5                                                 |
| 0.195                  | 10.8                                                 | 0.244                  | 11.1                                                 |
| 0.195                  | 11.4                                                 | 0.244                  | 10.0                                                 |
| 0.183                  | 11.4                                                 | 0.122                  | 11.3                                                 |
| 0.183                  | 11.2                                                 | 0.122                  | 11.5                                                 |
| 0.183                  | 10.6                                                 | 0.122                  | 11.4                                                 |
| 0.222                  | 11.3                                                 | 0.0732                 | 9.3                                                  |
| 0.222                  | 11.0                                                 | 0.0732                 | 8.7                                                  |
| 0.222                  | 11.6                                                 | 0.0732                 | 9.2                                                  |
| 0.256                  | 12.5                                                 | 0.0366                 | 5.5                                                  |
| 0.256                  | 12.1                                                 | 0.0366                 | 5.8                                                  |
| 0.256                  | 11.7                                                 | 0.0366                 | 5.1                                                  |
| 0.305                  | 12.2                                                 | 0.122                  | 10.5                                                 |
| 0.305                  | 12.9                                                 | 0.122                  | 10.2                                                 |
| 0.305                  | 12.7                                                 | 0.122                  | 10.8                                                 |
| 0.488                  | 13.2                                                 | 0.0523                 | 7.3                                                  |
| 0.488                  | 13.2                                                 | 0.0523                 | 7.6                                                  |
| 0.488                  | 13.3                                                 | 0.0523                 | 7.7                                                  |
| 0.0976                 | 10.0                                                 |                        |                                                      |
| 0.0976                 | 10.4                                                 |                        |                                                      |
| 0.0976                 | 9.8                                                  |                        |                                                      |



**Table S4.** Initial rate versus 4-F-styrene concentration, with [4] = 0.10 M, [Et<sub>2</sub>Zn] = 0.15 M, [Ni(COD)<sub>2</sub>] = 7.7 mM, [bipy] = 8.2 mM, 23 ± 0.5 °C.

| 4-F-styrene (M) | Initial Rate ( $\times 10^{-5}$ M s <sup>-1</sup> ) | 4-F-styrene (M) | Initial Rate ( $\times 10^{-5}$ M s <sup>-1</sup> ) |
|-----------------|-----------------------------------------------------|-----------------|-----------------------------------------------------|
| 0.016           | 12.6                                                | 0.008           | 11.9                                                |
| 0.016           | 11.3                                                | 0.008           | 12.4                                                |
| 0.016           | 12.0                                                | 0.008           | 11.4                                                |
| 0.016           | 11.8                                                | 0.003           | 11.6                                                |
| 0.016           | 11.6                                                | 0.003           | 11.7                                                |
| 0.016           | 12.6                                                | 0.003           | 11.8                                                |
| 0.005           | 12.3                                                | 0               | 13.0                                                |
| 0.005           | 14.3                                                | 0               | 12.8                                                |
| 0.005           | 13.1                                                | 0               | 13.7                                                |
| 0.005           | 12.2                                                | 0.003           | 11.9                                                |
| 0.005           | 12.5                                                | 0.003           | 11.5                                                |
| 0.005           | 12.9                                                | 0.003           | 12.4                                                |
| 0.011           | 12.0                                                | 0               | 12.6                                                |
| 0.011           | 12.1                                                | 0               | 12.0                                                |
| 0.011           | 12.5                                                | 0               | 11.7                                                |

**Table S5.** Initial rate versus Ph<sub>2</sub>Zn concentration, with [4] = 0.10 M, [Ni(COD)<sub>2</sub>] = 7.7 mM, [bipy] = 8.2 mM, [4-F-styrene] = 0.016 M, 23 ± 0.5 °C.

| Ph <sub>2</sub> Zn (M) | Initial Rate ( $\times 10^{-5}$ M s <sup>-1</sup> ) | Ph <sub>2</sub> Zn (M) | Initial Rate ( $\times 10^{-5}$ M s <sup>-1</sup> ) |
|------------------------|-----------------------------------------------------|------------------------|-----------------------------------------------------|
| 0.15                   | 6.7                                                 | 0.09                   | 4.2                                                 |
| 0.15                   | 6.0                                                 | 0.09                   | 4.8                                                 |
| 0.15                   | 6.9                                                 | 0.09                   | 5.2                                                 |
| 0.21                   | 10.2                                                | 0.11                   | 18.3                                                |
| 0.21                   | 9.1                                                 | 0.11                   | 17.6                                                |
| 0.21                   | 10.8                                                | 0.11                   | 19.2                                                |
| 0.27                   | 14.2                                                |                        |                                                     |
| 0.27                   | 12.8                                                |                        |                                                     |
| 0.27                   | 12.1                                                |                        |                                                     |

**Table S6.** Initial rates at variable temperatures, with [4] = 0.10 M, [Et<sub>2</sub>Zn] = 0.15 M, [Ni(COD)<sub>2</sub>] = 7.7 mM, [bipy] = 8.0 mM, [4-F-styrene] = 15.7 mM.

| Temperature (°C) | Initial Rate ( $\times 10^{-5}$ M s <sup>-1</sup> ) | Temperature (°C) | Initial Rate ( $\times 10^{-5}$ M s <sup>-1</sup> ) |
|------------------|-----------------------------------------------------|------------------|-----------------------------------------------------|
| 23               | 11.6                                                | 35               | 22.0                                                |
| 23               | 11.4                                                | 35               | 19.9                                                |
| 23               | 10.8                                                | 35               | 20.9                                                |
| 0                | 0.86                                                | 31               | 16.7                                                |
| 0                | 0.83                                                | 31               | 13.3                                                |
| 0                | 0.91                                                | 31               | 14.8                                                |
| 41               | 38.3                                                | 15               | 4.0                                                 |
| 41               | 34.3                                                | 15               | 3.8                                                 |
| 39               | 29.6                                                | 15               | 3.9                                                 |
| 39               | 28.8                                                |                  |                                                     |

**Kinetic Data for Desymmetrization of 4-methylglutaric anhydride (**8**) with Ni(COD)<sub>2</sub>, *i*PrPHOX and styrene.**

**Table S7.** Initial rate versus Ni(COD)<sub>2</sub>-*i*PrPHOX concentration, with [**8**] = 0.11 M, [Et<sub>2</sub>Zn] = 0.16 M, [styrene] = 0.032 M, 0 ± 0.5 °C

| Ni(COD) <sub>2</sub> / <i>i</i> PrPHOX (M) | Initial Rate (× 10 <sup>-5</sup> M s <sup>-1</sup> ) | Ni(COD) <sub>2</sub> / <i>i</i> PrPHOX (M) | Initial Rate (× 10 <sup>-5</sup> M s <sup>-1</sup> ) |
|--------------------------------------------|------------------------------------------------------|--------------------------------------------|------------------------------------------------------|
| 0.0095                                     | 8.12                                                 | 0.012                                      | 9.70                                                 |
| 0.0093                                     | 6.93                                                 | 0.012                                      | 8.60                                                 |
| 0.0093                                     | 7.36                                                 | 0.012                                      | 9.30                                                 |
| 0.0093                                     | 7.23                                                 | 0.0050                                     | 4.37                                                 |
| 0.0181                                     | 12.7                                                 | 0.0050                                     | 4.16                                                 |
| 0.0181                                     | 13.8                                                 | 0.0042                                     | 3.77                                                 |
| 0.0057                                     | 4.62                                                 | 0.0075                                     | 6.22                                                 |
| 0.0057                                     | 5.29                                                 | 0.0075                                     | 6.12                                                 |
| 0.0057                                     | 4.53                                                 | 0.0075                                     | 5.86                                                 |
| 0.0098                                     | 6.81                                                 |                                            |                                                      |
| 0.0098                                     | 6.61                                                 |                                            |                                                      |
| 0.0098                                     | 7.35                                                 |                                            |                                                      |

**Table S8.** Initial rate versus Et<sub>2</sub>Zn concentration, with [**8**] = 0.11 M, [Ni(COD)<sub>2</sub>] = 6.5 mM, [*i*PrPHOX] = 7.2 mM, [styrene] = 0.032 M, 0 ± 0.5 °C

| Et <sub>2</sub> Zn (M) | Initial Rate (× 10 <sup>-5</sup> M s <sup>-1</sup> ) | Et <sub>2</sub> Zn (M) | Initial Rate (× 10 <sup>-5</sup> M s <sup>-1</sup> ) |
|------------------------|------------------------------------------------------|------------------------|------------------------------------------------------|
| 0.08                   | 6.14                                                 | 0.325                  | 6.89                                                 |
| 0.08                   | 6.81                                                 | 0.325                  | 6.49                                                 |
| 0.08                   | 6.56                                                 | 0.325                  | 6.78                                                 |
| 0.244                  | 5.96                                                 | 0.162                  | 6.41                                                 |
| 0.244                  | 5.97                                                 | 0.162                  | 6.72                                                 |
| 0.244                  | 6.48                                                 | 0.162                  | 6.31                                                 |

**Table S9.** Initial rate versus anhydride **8** concentration, with  $[\text{Ni}(\text{COD})_2] = 6.5 \text{ mM}$ ,  $[\text{iPrPHOX}] = 7.2 \text{ mM}$ ,  $[\text{Et}_2\text{Zn}] = 0.16 \text{ M}$ ,  $[\text{styrene}] = 0.032 \text{ M}$ ,  $0 \pm 0.5 \text{ }^\circ\text{C}$

| Anhydride ( <b>8</b> ) (M) | Initial Rate ( $\times 10^{-5} \text{ M s}^{-1}$ ) | Anhydride ( <b>8</b> ) (M) | Initial Rate ( $\times 10^{-5} \text{ M s}^{-1}$ ) |
|----------------------------|----------------------------------------------------|----------------------------|----------------------------------------------------|
| 0.10                       | 5.27                                               | 0.07                       | 3.56                                               |
| 0.10                       | 6.03                                               | 0.07                       | 3.66                                               |
| 0.10                       | 5.17                                               | 0.07                       | 4.20                                               |
| 0.18                       | 9.53                                               | 0.14                       | 7.02                                               |
| 0.18                       | 9.30                                               | 0.14                       | 6.58                                               |
| 0.18                       | 8.43                                               | 0.14                       |                                                    |

**Table S10.** Initial rate versus styrene concentration, with  $[\textbf{8}] = 0.11 \text{ M}$ ,  $[\text{Et}_2\text{Zn}] = 0.16 \text{ M}$ ,  $[\text{Ni}(\text{COD})_2] = 6.5 \text{ mM}$ ,  $[\text{iPrPHOX}] = 7.2 \text{ mM}$ ,  $0 \pm 0.5 \text{ }^\circ\text{C}$ .

| Styrene (M) | Initial Rate ( $\times 10^{-5} \text{ M s}^{-1}$ ) | Styrene (M) | Initial Rate ( $\times 10^{-5} \text{ M s}^{-1}$ ) |
|-------------|----------------------------------------------------|-------------|----------------------------------------------------|
| 0.11        | 7.22                                               | 0.02        | 6.52                                               |
| 0.11        | 7.59                                               | 0.02        | 6.50                                               |
| 0.11        | 7.20                                               | 0.02        | 6.60                                               |
| 0           | 2.16                                               | 0.05        | 6.87                                               |
| 0           | 2.60                                               | 0.05        | 7.00                                               |
| 0           | 2.40                                               | 0.05        | 7.13                                               |
| 0.01        | 5.14                                               |             |                                                    |
| 0.01        | 5.12                                               |             |                                                    |
| 0.01        | 4.96                                               |             |                                                    |

## References

† Colorado State University

‡ Cornell University

<sup>1</sup> (a) Bercot, E. A.; Rovis, T. *J. Am. Chem. Soc.* **2002**, *124*, 174. (b) Bercot, E. A.; Rovis, T. *J. Am. Chem. Soc.* **2005**, *127*, 247.

<sup>2</sup> Paquette, L. A.; Boulet, S. L. *Synthesis*, **2002**, 888.

<sup>3</sup> Getzler, Y. D. Y. L.; Kundnani, V. K.; Lobkovsky, E. B.; Coates, G. W. *J. Am. Chem. Soc.* **2004**, *126*, 6842.

<sup>4</sup> Allen, J. V.; Dawson, G. J.; Frost, C. G.; Williams, J. M. J. *Tetrahedron*, **1994**, *50*, 799.
